# Supplementary material
Source: PubMed Central journal article supplement (PMC3806304)
Supplement: NIHMS487685-supplement-4.pdf [file NIHMS487685-supplement-4.pdf]

# SUPPLEMENTAL MATERIAL

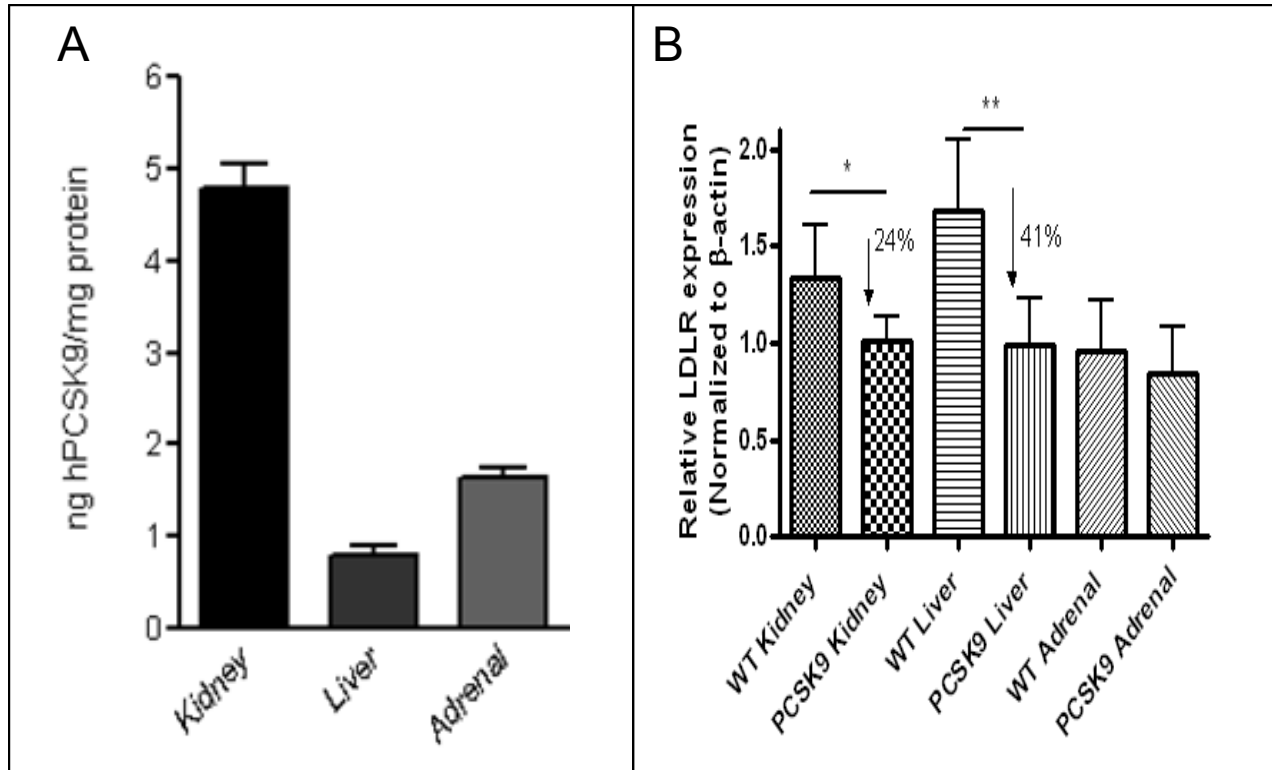

**Supplementary figure 1:** (A) ELISA quantification of hPCSK9 in tissues of transgenic mice. (B) Effect of hPCSK9 expression *in-vivo*: quantification of immunoblots for hepatic LDLR levels normalized to  $\beta$ -actin (n=4-6). (\*p<0.05, \*\* p<0.01).

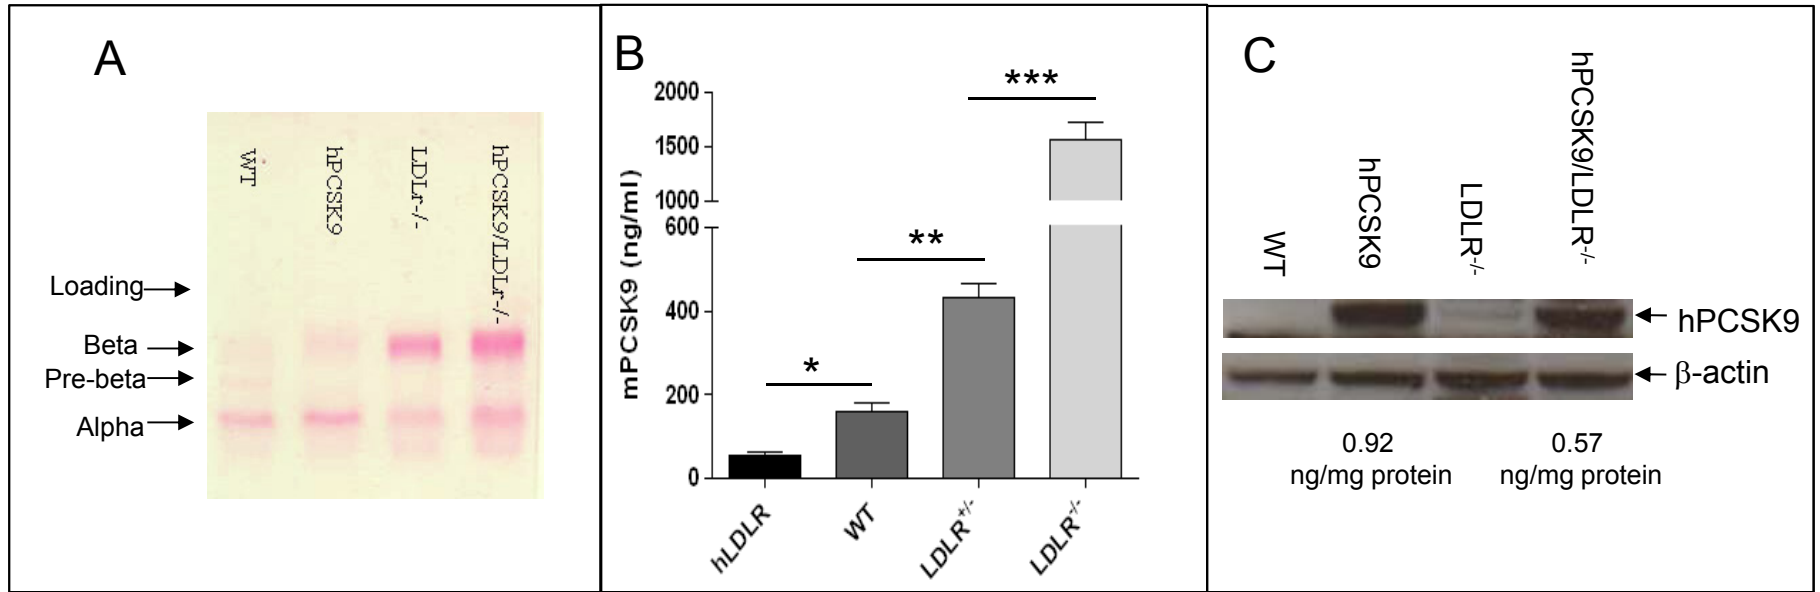

**Supplementary figure 2:** (A) Agarose gel separation of serum lipoproteins. (B) mPCSK9 levels. (C) Immunoblot and ELISA quantification of hPCSK9 in liver of controls and transgenic mice.

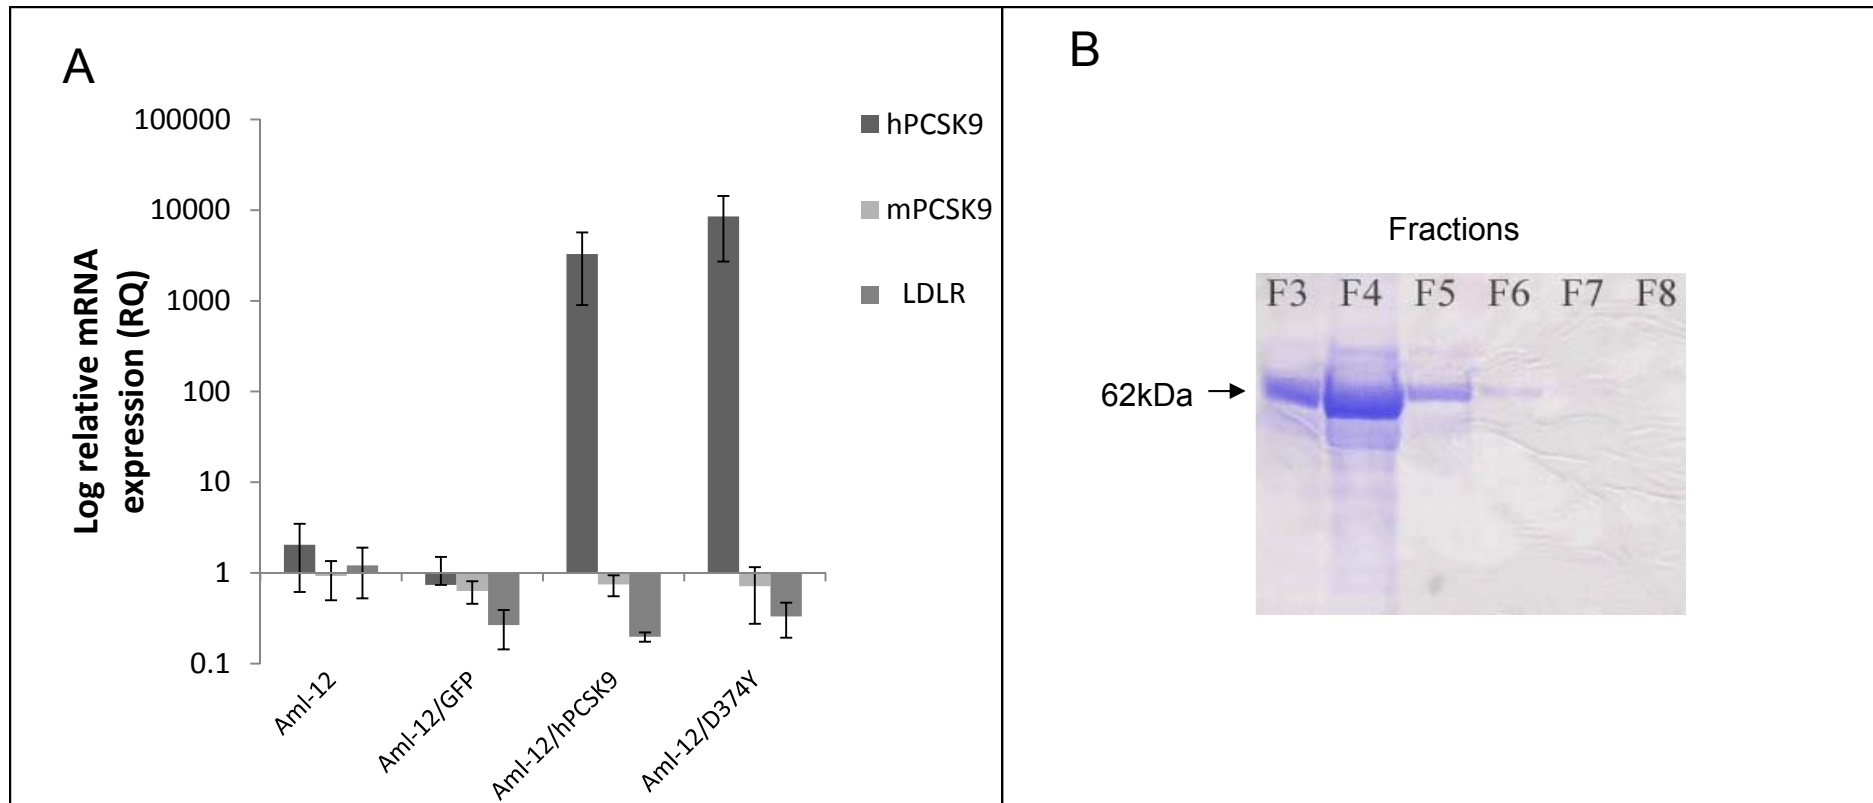

**Supplementary figure 3:** (A) qRT-PCR for hPCSK9, mPCSK9 and LDLR in Aml-12 cells transduced with pWPI-GFP, pWPI-hPCSK9, or pWPI-D374Y gain of function mutation. (B) Coomassie blue stain of His-tagged eluted fraction from “ProBond” Nickel column of media from HEK293T cell transduced with pWPI-hPCSK9 lentivirus.

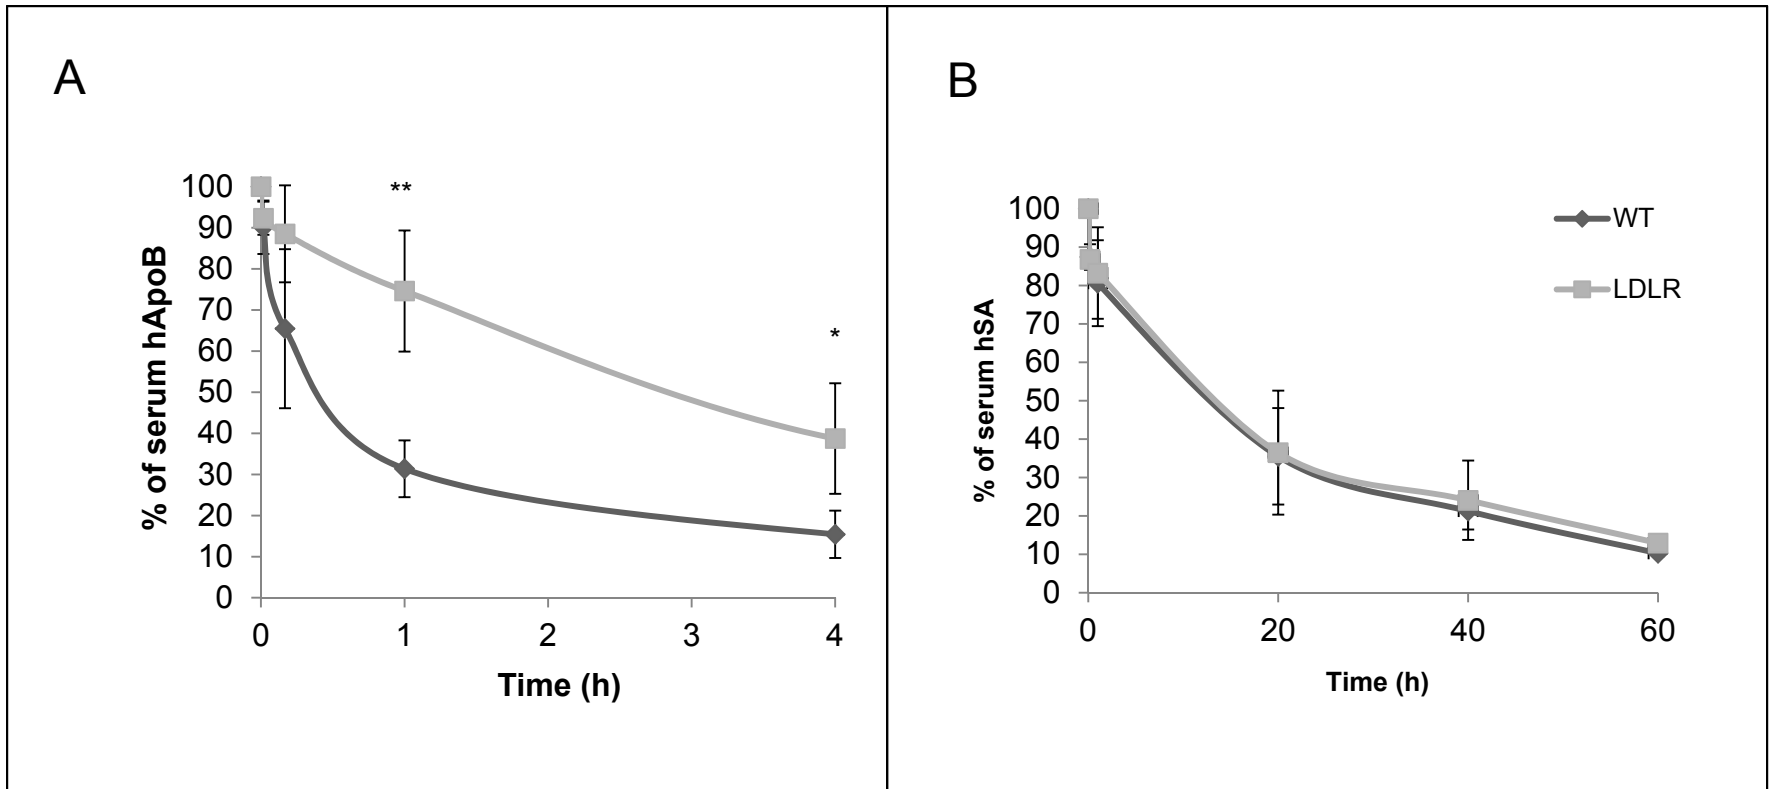

**Supplementary figure 4: Turnover of human serum albumin and human LDL in mice.** (A) Clearance of human LDL injected to WT or LDLR<sup>-/-</sup> mice (n=3), (B) Clearance of human serum albumin injected to WT or LDLR<sup>-/-</sup> mice (n=3), (\*p<0.05, \*\* p<0.01).

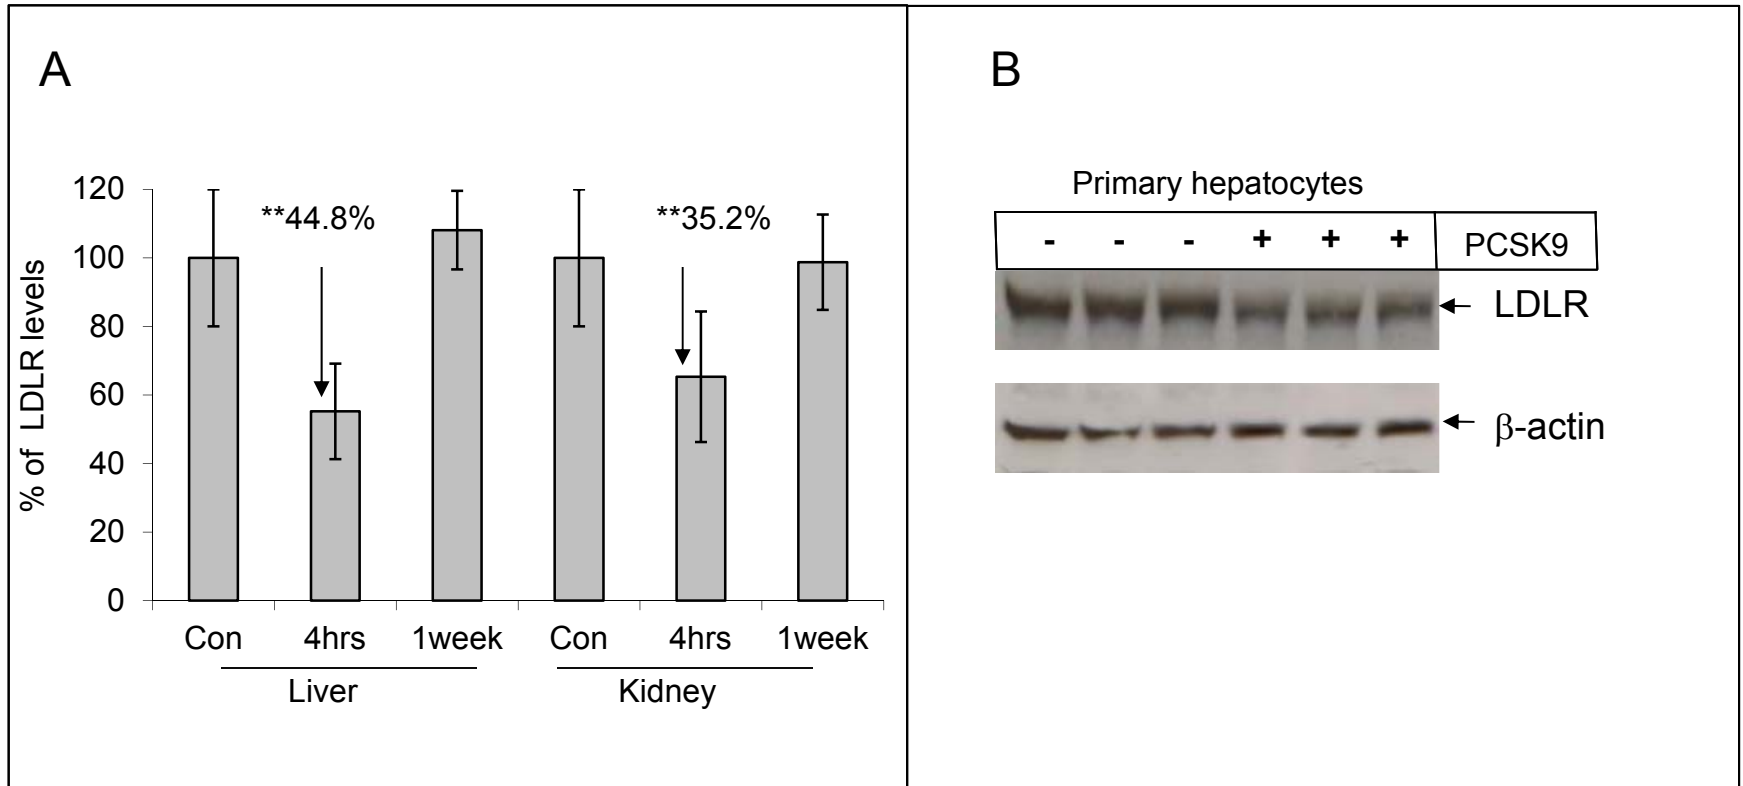

**Supplementary figure 5:** (A) Quantification of immunoblots for hepatic and renal LDLR normalized to  $\beta$ -actin (n=3). (B) Immunoblot for LDLR, and beta actin in primary hepatocyte upon addition of hPCSK9 (500 ng/ml) for 4hrs, (p<0.01).

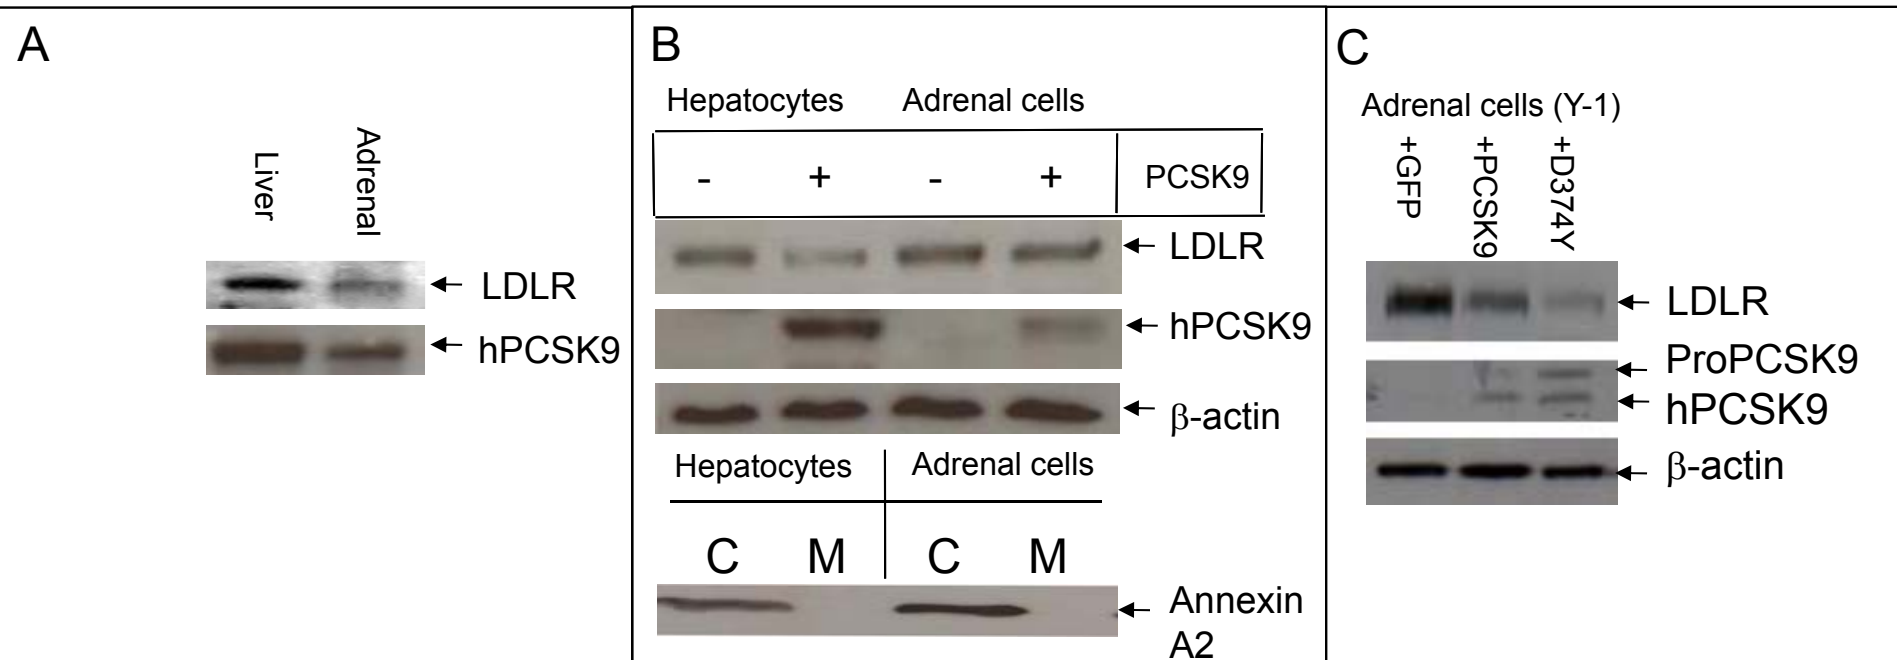

**Supplementary figure 6:** Effect of hPCSK9 in the adrenals. (A) Immunoblot of LDLR after co-immunoprecipitation with hPCSK9 of adrenal and liver from hPCSK9tg mice. (B) Immunoblot for LDLR, PCSK9, beta actin and annexinA2 in hepatocytes (AML-12) and adrenal (Y-1) cells (C=cell, M=media). (C) immunoblot of mouse adrenal cells (Y-1) transduced with GFP (control), PCSK9, or PCSK9 GOF mutation (D374Y).

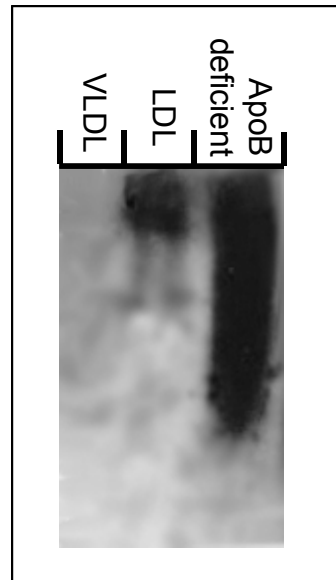

**Supplementary figure 7:** hPCSK9 immunoblot for FPLC fractions treated with cross linker DSP (0.5mM, 30 min) on a native gel (4-16%).



| %mPCSK9  |         |     |      | %hPCSK9  |         |     |      |
|----------|---------|-----|------|----------|---------|-----|------|
| fraction |         |     |      | fraction |         |     |      |
| mice     | IDL/LDL | HDL | LPDS | mice     | IDL/LDL | HDL | LPDS |
| WT       | 0.8     | 2.6 | 96.7 | WT       | N/D     | N/D | N/D  |
| hPCSK9   | 3.3     | 0.6 | 96.1 | hPCSK9   | 0.8     | 3.0 | 95.5 |

**Supplementary table 1:** Serum mPCSK9 and hPCSK9 distribution after high-salt (KBr) ultracentrifugal separation of lipoproteins from hPCSK9 transgenic mouse serum, measured by PCSK9 ELISA and presented as % of total PCSK9.
